# Supplementary material for: Pembrolizumab monotherapy for non-small cell lung cancer (NSCLC): can patient stratification be improved in the UK Tayside population? A retrospective cohort study
Source: PubMed Central journal article supplement — BMJ Open. 2023 Nov 21;13(11):e076715. doi: 10.1136/bmjopen-2023-076715 (PMC10668179; doi:10.1136/bmjopen-2023-076715), 2023-11-21
Supplement: bmjopen-2023-076715supp001.pdf [file bmjopen-2023-076715supp001.pdf]

## Mander *et al*, Supplementary Table 1 Summary of Patient demographics

| Characteristics                                                  | PD-L1 TPS 50-79% (N = 40) | PD-L1 TPS ≥80% (N = 60) | p-value for pairwise comparison (Mann-Whitney test) |
|------------------------------------------------------------------|---------------------------|-------------------------|-----------------------------------------------------|
| <b>Age - yr (at diagnosis)</b>                                   |                           |                         | 0.428                                               |
| Median                                                           | 67                        | 68                      |                                                     |
| Range                                                            | 47-81                     | 40-91                   |                                                     |
| <b>Sex</b>                                                       |                           |                         | 0.955                                               |
| Male - no. (%)                                                   | 18 (45.0%)                | 26 (43.3%)              |                                                     |
| Female - no. (%)                                                 | 22 (55.0%)                | 34 (56.7%)              |                                                     |
| <b>Performance status</b>                                        |                           |                         | 0.353                                               |
| 0 - no. (%)                                                      | 7 (17.5%)                 | 8 (13.3%)               |                                                     |
| 0-1 - no. (%)                                                    | 0 (0%)                    | 3 (5%)                  |                                                     |
| 1 - no. (%)                                                      | 20 (50%)                  | 35 (58.3%)              |                                                     |
| 1-2 - no. (%)                                                    | 0 (0%)                    | 3 (5%)                  |                                                     |
| 2 - no. (%)                                                      | 8 (20%)                   | 10 (16.7%)              |                                                     |
| 2-3 - no. (%)                                                    | 3 (7.5%)                  | 0 (0%)                  |                                                     |
| 3 - no. (%)                                                      | 2 (5.0%)                  | 1 (1.7%)                |                                                     |
| <b>Smoking status</b>                                            |                           |                         | 0.306                                               |
| Current - no. (%)                                                | 22 (55.0%)                | 23 (38.3%)              |                                                     |
| Former - no. (%)                                                 | 12 (30.0%)                | 31 (51.7%)              |                                                     |
| Never - no. (%)                                                  | 6 (15.0%)                 | 6 (10.0%)               |                                                     |
| <b>Histology</b>                                                 |                           |                         | 0.280                                               |
| Squamous cell carcinoma - no. (%)                                | 12 (30.0%)                | 13 (21.7%)              |                                                     |
| Adenocarcinoma- no. (%)                                          | 25 (62.5%)                | 41 (68.3%)              |                                                     |
| Adenosquamous - no. (%)                                          | 1 (2.5%)                  | 1 (1.7%)                |                                                     |
| Not specified - no. (%)                                          | 2 (5.0%)                  | 5 (8.3%)                |                                                     |
| <b>EGFR mutation status</b>                                      |                           |                         | 0.692                                               |
| Positive - no. (%)                                               | 1 (2.5%)                  | 1 (1.7%)                |                                                     |
| Negative - no. (%)                                               | 25 (62.5%)                | 43 (71.7%)              |                                                     |
| Unknown - no. (%)                                                | 14 (35.0%)                | 16 (26.7%)              |                                                     |
| <b>ALK translocation status</b>                                  |                           |                         | 1.000                                               |
| Positive - no. (%)                                               | 0 (0%)                    | 0 (0%)                  |                                                     |
| Negative - no. (%)                                               | 25 (62.5%)                | 43 (71.7%)              |                                                     |
| Unknown - no. (%)                                                | 15 (37.5%)                | 17 (28.3%)              |                                                     |
| <b>ROS-1 rearrangement status</b>                                |                           |                         | 1.000                                               |
| Positive - no. (%)                                               | 0 (0%)                    | 0 (0%)                  |                                                     |
| Negative - no. (%)                                               | 10 (25.0%)                | 19 (31.7%)              |                                                     |
| Unknown - no. (%)                                                | 30 (75.0%)                | 41 (68.3%)              |                                                     |
| <b>Pembrolizumab therapy</b>                                     |                           |                         | 0.101                                               |
| First line (%)                                                   | 34 (85%)                  | 54 (85%)                |                                                     |
| Second line (%)                                                  | 6 (15%)                   | 6 (15%)                 |                                                     |
| <b>Stage</b>                                                     |                           |                         | 0.422                                               |
| I - no. (%)                                                      | 1 (2.5%)                  | 1 (1.7%)                |                                                     |
| II - no. (%)                                                     | 3 (7.5%)                  | 2 (3.3%)                |                                                     |
| III - no. (%)                                                    | 10 (25.0%)                | 14 (23.3%)              |                                                     |
| IV - no. (%)                                                     | 26 (65.0%)                | 43 (71.7%)              |                                                     |
| <b>Radiotherapy before or within two months of immunotherapy</b> |                           |                         | 0.944                                               |
| Radical - no. (%)                                                | 4 (10.0%)                 | 6 (10.0%)               | 0.968                                               |
| Palliative - no. (%)                                             | 12 (30.0%)                | 17 (28.3%)              | 0.961                                               |
| Thoracic - no. (%)                                               | 4 (10.0%)                 | 10 (16.7%)              |                                                     |
| Extra-thoracic - no. (%)                                         | 8 (20.0%)                 | 7 (11.7%)               |                                                     |

Mander *et al*, Supplementary Figure 1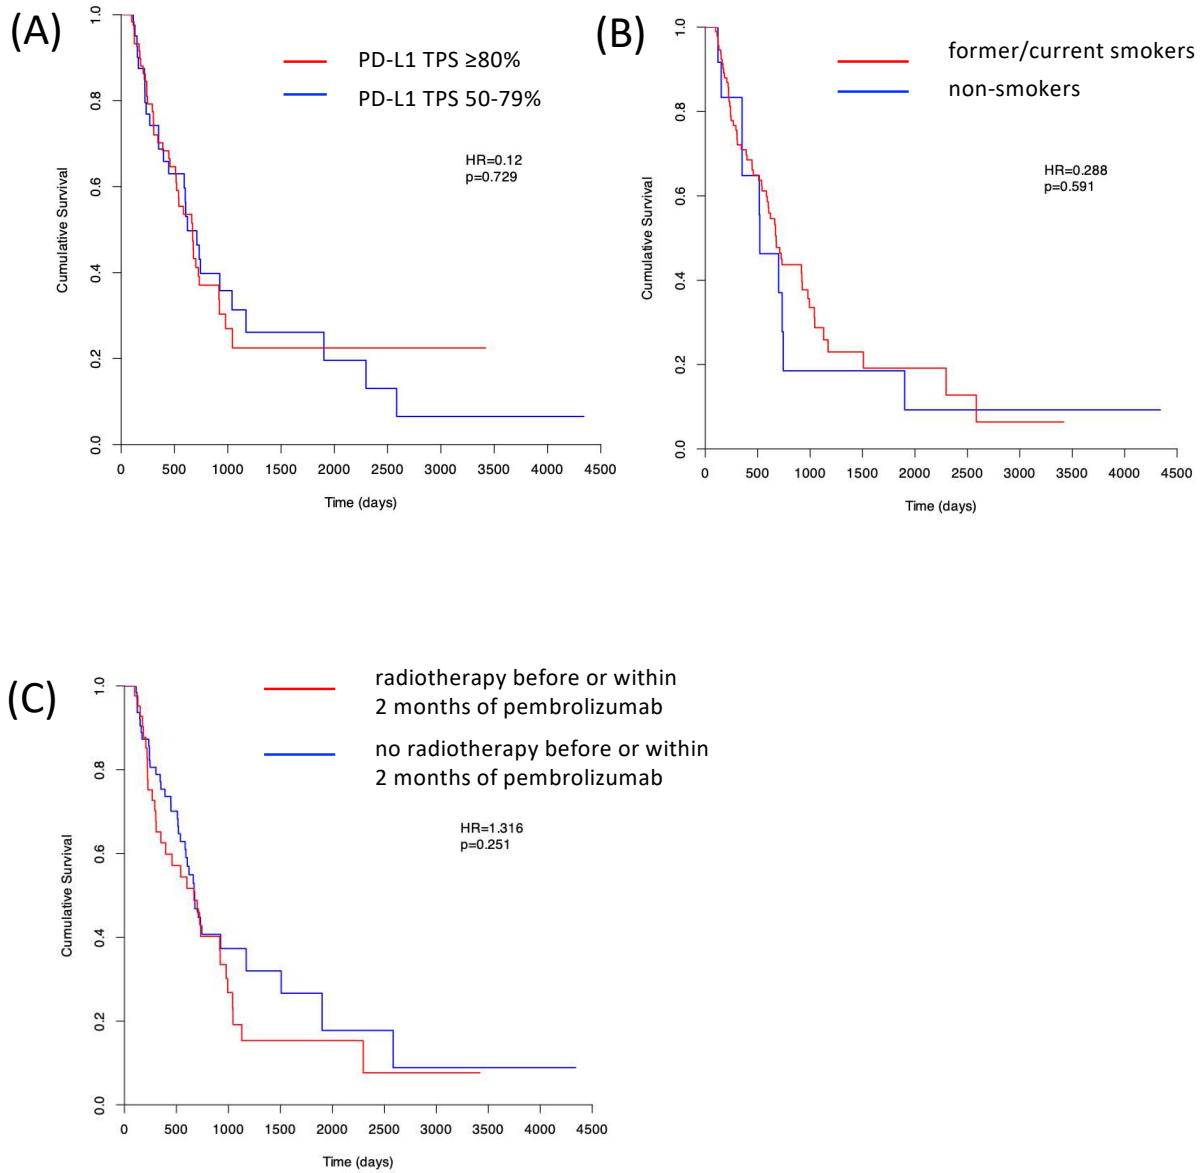

Mander *et al*, Supplementary Table 2  
Cox regression analysis

| Variable                                                                         | Hazard Ratio (HR) | Standard Error (SE) | p-value      |
|----------------------------------------------------------------------------------|-------------------|---------------------|--------------|
| <b>PD-L1≥80% (yes/no)</b>                                                        | 1.178             | 0.286               | 0.568        |
| <b>Smoking status (yes/no)</b>                                                   | 2.040             | 0.408               | 0.081        |
| <b>Performance Status (PS)</b>                                                   |                   |                     | <b>0.009</b> |
| PS(1)                                                                            | 0.074             | 0.747               | 0.000        |
| PS(2)                                                                            | 0.523             | 0.857               | 0.449        |
| PS(3)                                                                            | 0.133             | 0.661               | 0.002        |
| PS(4)                                                                            | 0.279             | 0.982               | 0.193        |
| PS(5)                                                                            | 0.137             | 0.695               | 0.004        |
| (PS(6)                                                                           | 0.073             | 1.191               | 0.028        |
| <b>Stage</b>                                                                     |                   |                     | 0.126        |
| Stage(1)                                                                         | 0.616             | 1.032               | 0.639        |
| Stage(2)                                                                         | 0.310             | 0.657               | 0.075        |
| Stage(3)                                                                         | 0.504             | 0.370               | 0.064        |
| <b>Histology</b>                                                                 |                   |                     | 0.827        |
| Histology(1)                                                                     | 1.028             | 1.041               | 0.979        |
| Histology(2)                                                                     | 1.237             | 1.071               | 0.843        |
| <b>Radiotherapy before of within 2 months of starting immunotherapy (yes/no)</b> | 0.478             | 0.322               | <b>0.022</b> |
